# Supplementary material for: Saireito, a Japanese herbal medicine, alleviates leaky gut associated with antibiotic-induced dysbiosis in mice
Source: PubMed Central journal article supplement (PMC9200308; doi:10.1371/journal.pone.0269698), 2022-06-15

(A)

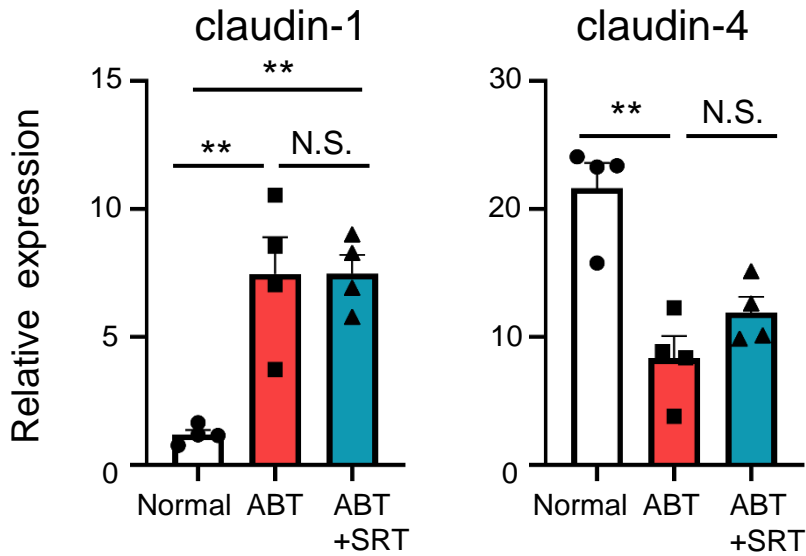

(B)

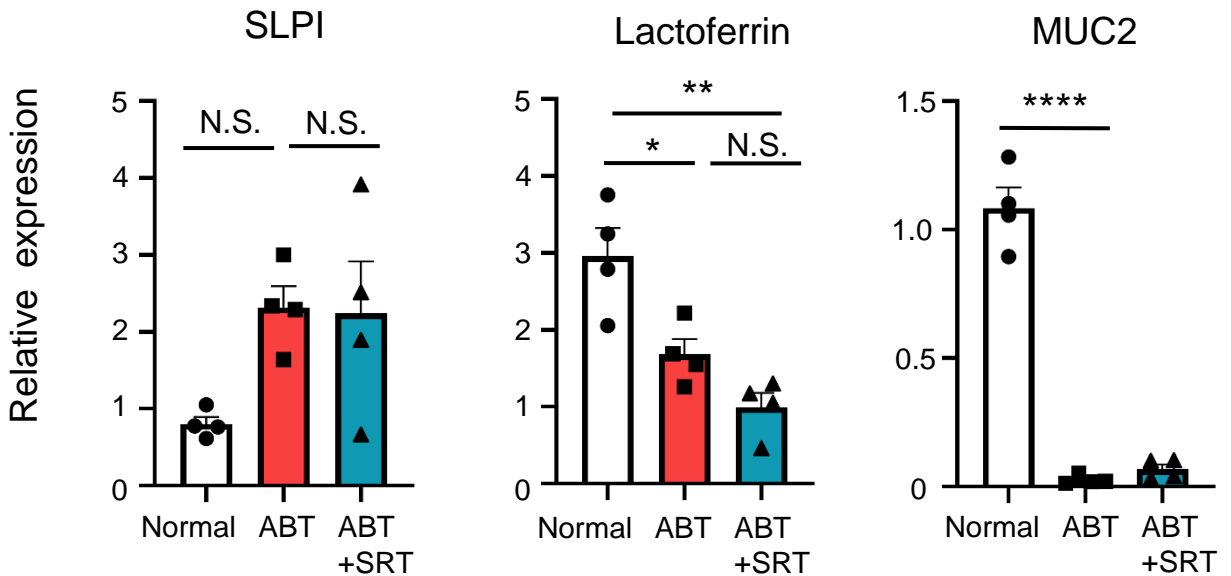

Supplement: pone.0269698.s001.pdf [file pone.0269698.s001.pdf]
