# Supplementary material for: Saireito, a Japanese herbal medicine, alleviates leaky gut associated with antibiotic-induced dysbiosis in mice
Source: PubMed Central journal article supplement (PMC9200308; doi:10.1371/journal.pone.0269698), 2022-06-15
Supplement: pone.0269698.s002.pdf [file pone.0269698.s002.pdf]

(A)

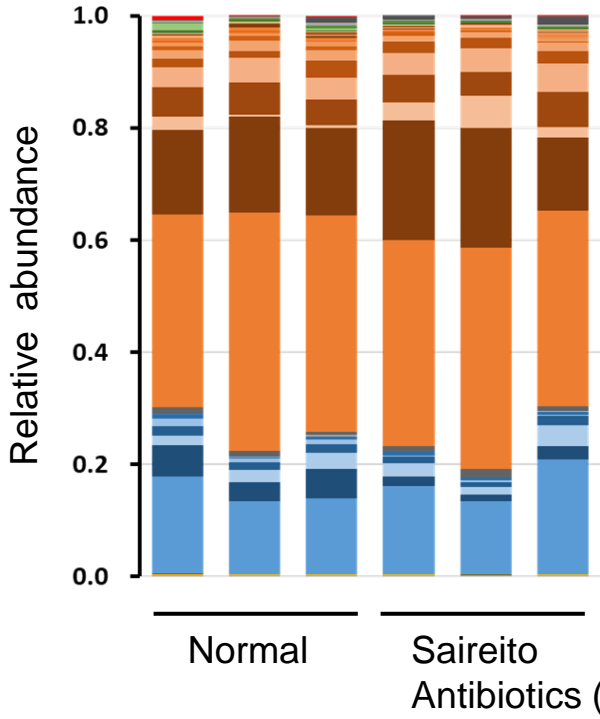

- |                                                                    |                                                                    |                                                              |                                                            |                                                                 |                                                                  |
|--------------------------------------------------------------------|--------------------------------------------------------------------|--------------------------------------------------------------|------------------------------------------------------------|-----------------------------------------------------------------|------------------------------------------------------------------|
| <span style="color: blue;">■</span> S24-7_na                       | <span style="color: blue;">■</span> [Prevotella]                   | <span style="color: lightblue;">■</span> Bacteroides         | <span style="color: blue;">■</span> Prevotella             | <span style="color: lightblue;">■</span> Rikenellaceae_na       | <span style="color: blue;">■</span> Parabacteroides              |
| <span style="color: lightblue;">■</span> Butyricimonas             | <span style="color: blue;">■</span> Prevotellaceae_na              | <span style="color: lightblue;">■</span> Bacteroidales_na_na | <span style="color: orange;">■</span> Clostridiales_na_na  | <span style="color: brown;">■</span> Lachnospiraceae_na         | <span style="color: lightorange;">■</span> Lactobacillus         |
| <span style="color: brown;">■</span> Oscillospira                  | <span style="color: lightorange;">■</span> Ruminococcaceae_na      | <span style="color: brown;">■</span> [Ruminococcus]          | <span style="color: lightorange;">■</span> Ruminococcus    | <span style="color: orange;">■</span> Coprococcus               | <span style="color: lightorange;">■</span> Dorea                 |
| <span style="color: orange;">■</span> Lachnospiraceae_Other        | <span style="color: lightorange;">■</span> Erysipelotrichaceae_na  | <span style="color: orange;">■</span> Candidatus Arthromitus | <span style="color: green;">■</span> Enterobacteriaceae_na | <span style="color: darkgreen;">■</span> Pseudomonadaceae_na    | <span style="color: lightgreen;">■</span> Sutterella             |
| <span style="color: green;">■</span> Pseudomonas                   | <span style="color: lightgreen;">■</span> Enterobacteriaceae_Other | <span style="color: green;">■</span> Desulfovibrio           | <span style="color: lightgreen;">■</span> RF32_na_na       | <span style="color: darkgreen;">■</span> Desulfovibrionaceae_na | <span style="color: lightgreen;">■</span> Pseudomonadaceae_Other |
| <span style="color: darkgreen;">■</span> Desulfovibrionaceae_Other | <span style="color: green;">■</span> Klebsiella                    | <span style="color: red;">■</span> Akkermansia               |                                                            |                                                                 |                                                                  |
