# Supplementary material for: Saireito, a Japanese herbal medicine, alleviates leaky gut associated with antibiotic-induced dysbiosis in mice
Source: PubMed Central journal article supplement (PMC9200308; doi:10.1371/journal.pone.0269698), 2022-06-15
Supplement: pone.0269698.s004.pdf [file pone.0269698.s004.pdf]

| Target           | Forward 5'-3'               | Reverse 5'-3'            |
|------------------|-----------------------------|--------------------------|
| m $\beta$ -actin | CTTCCTCCCTGGAGAAGAGCTATGAGC | GCCTAGAAGCACTTGCGGTGCACG |
| m SLPI           | GGCCTTTTACCTTTCACGGTG       | TACGGCATTGTGGCTTCTCAA    |
| m lactoferin     | TCAAGAAATCCTCCACCCGC        | ACACGAGCTACACAGGTTGG     |
| m IL-1 $\beta$   | GAGTGTGGATCCCAAGCAAT        | TACCAGTTGGGGAAGCTCTGC    |
| m IL-6           | CCGGAGAGGAGACTTCACAG        | CAGAATTGCCATTGCACAAC     |
| m IL-12p40       | CCTGAAGTGTGAAGCACCAA        | TCAGGGGAACTGCTACTGCT     |
| m IL-13          | CCTGGCTCTTGCTTGCCTT         | GGTCTTGTGTGATGTTGCTCA    |
| m MUC2           | ACATCACCTGTCCCGACTTC        | GAGCAAGGGACTCTGGTCTG     |
| m ZO-1           | AGCGCCAGGAAGCTATATGA        | GCTGAATCGCTTCTTTCAGG     |
| m claudin1       | GCTGGGTTTCATCCTGGCTTCT      | CCTGAGCGGTCACGATGTTGTC   |
| m claudin4       | GGGGATCATCCTGAGTTGTG        | CACTGCATCTGACCTGTGCT     |
| m occludin       | GCGGAAAGAGTTGACAGTCC        | GGCACCAGAGGTGTTGACTT     |
| m E-cadherin     | ATCCTCGCCCTGCTGATT          | ACCACCGTTCTCCTCCGTA      |
